# Supplementary material for: Signal to Noise Ratio as a Cross-Platform Metric for Intraoperative Fluorescence Imaging
Source: PubMed Central journal article supplement — Mol Imaging. 2020 Apr 2;19:1536012120913693. doi: 10.1177/1536012120913693 (PMC7139168; doi:10.1177/1536012120913693), 2020-04-02
Supplement: Supplementary_Material.pdf [file Supplementary_Material.pdf]

## Supplementary Material

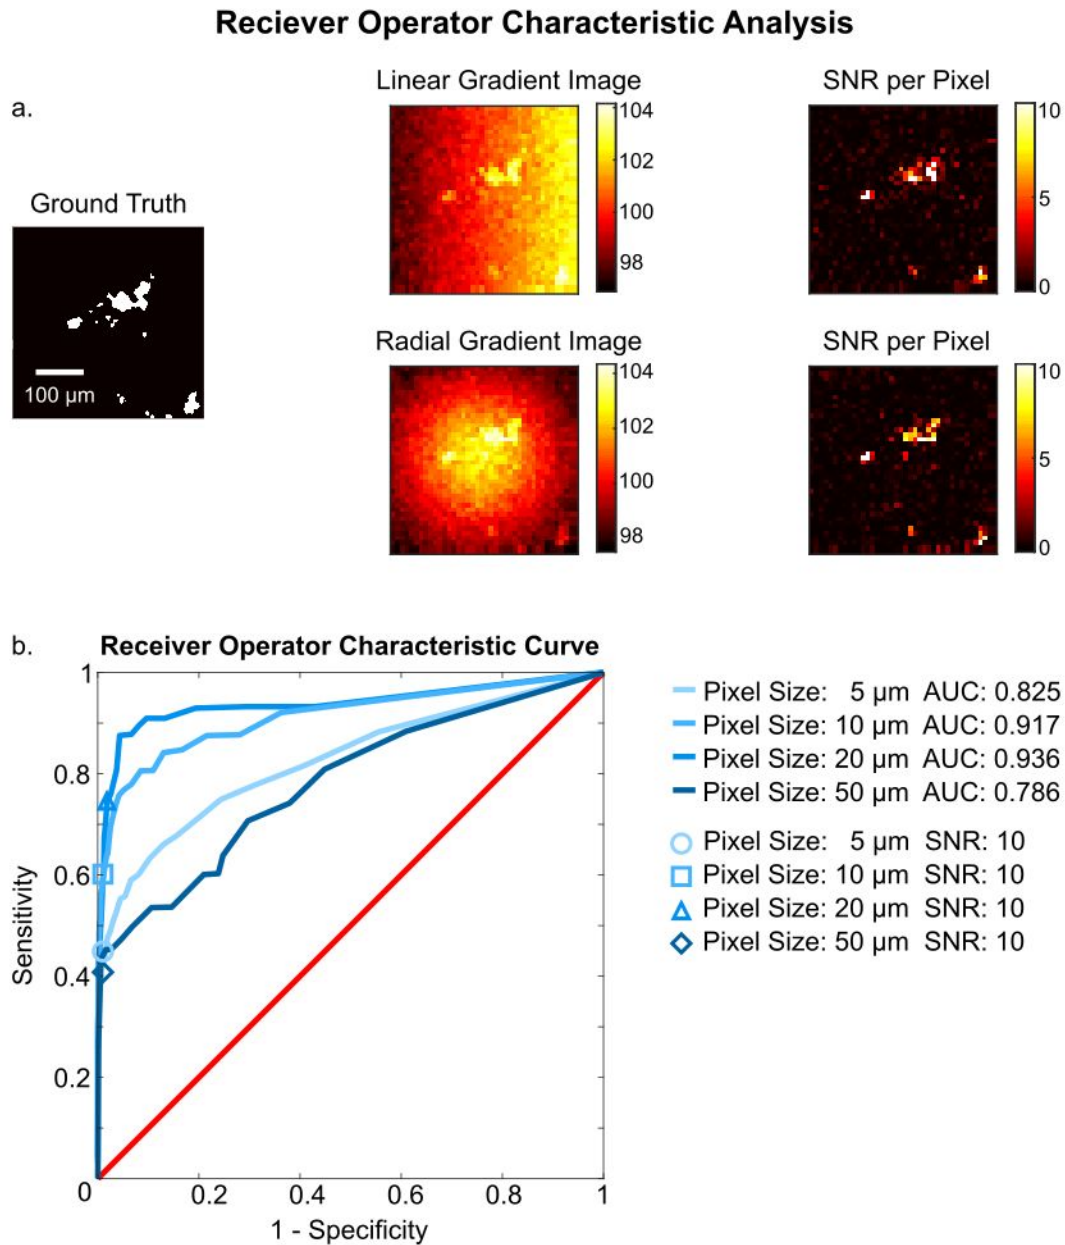

**Figure 1. Receiver Operator Characteristic at various spatial resolutions. (a)** The SNR of each pixel with linear and radial low frequency noise **(b)** ROC curve demonstrating poor detector ability at high and low spatial resolution (Pixel Sizes 5  $\mu\text{m}$ , 50  $\mu\text{m}$ ) and improved ability at optimized spatial resolutions (Pixel sizes 10  $\mu\text{m}$ , 20  $\mu\text{m}$ ).
